# Supplementary material
Source: Springer Nature journal article supplement (https://www.springermedizin.de/resource/supplementary/12961_2005_25_MOESM2_ESM.pdf/9571304)

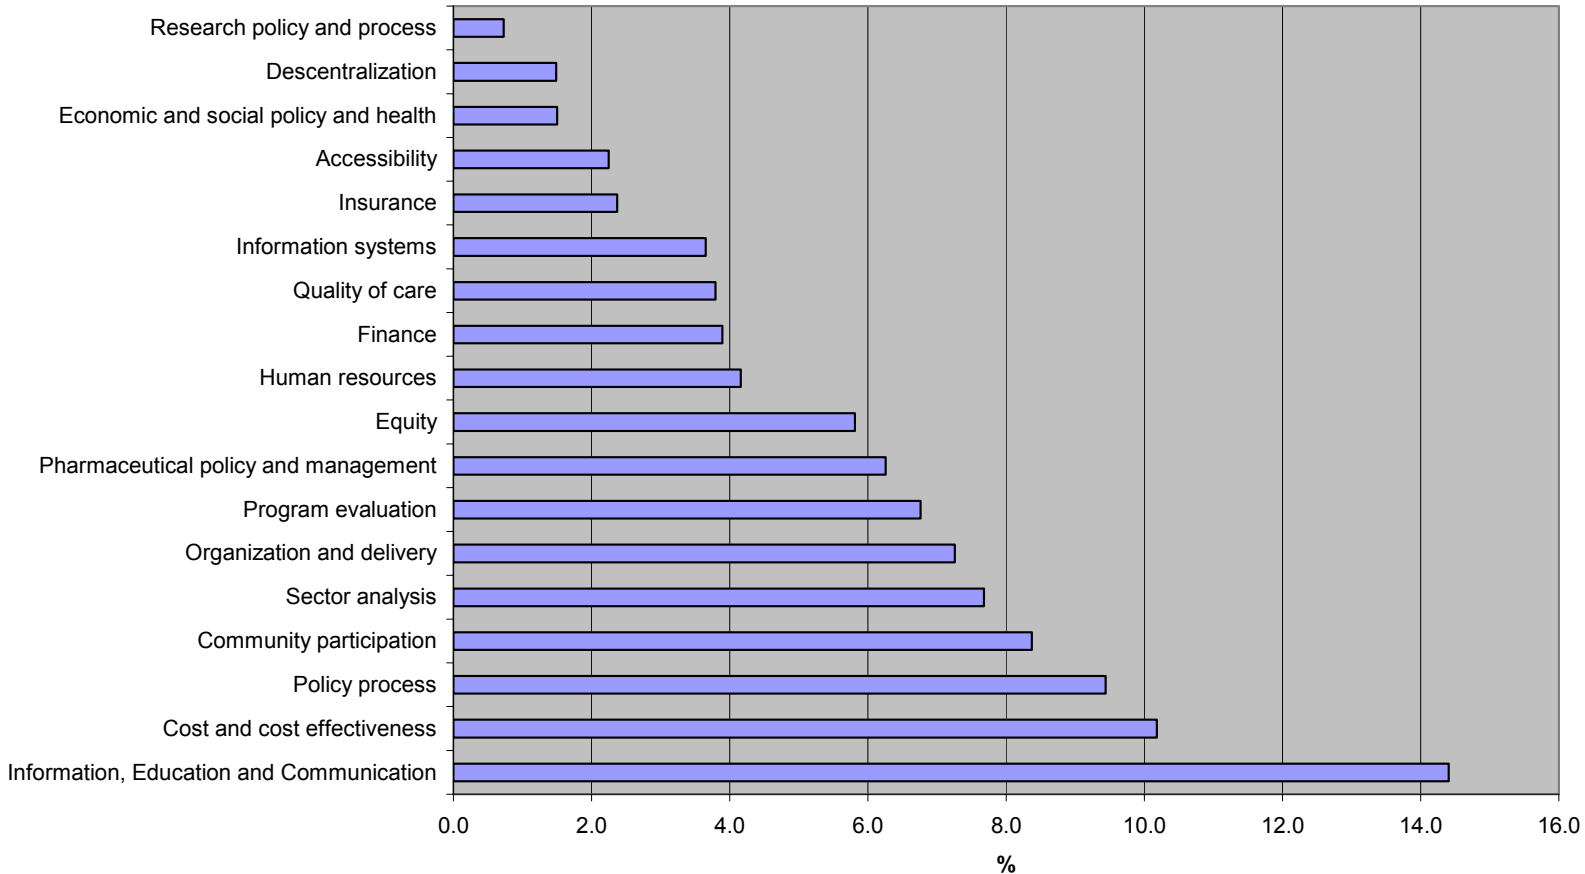

Supplement: MOESM2 [file 9571304]
